# Supplementary material
Source: PubMed Central journal article supplement (PMC2836067)

Supplemental Figure 1. **Characterization of GODZ-mediated  $\text{Ca}^{2+}$  transport.** *A*, summary of  $\text{Ca}^{2+}$ -induced currents in oocytes expressing GODZ cRNA at a holding voltage-clamp of -60 mV.  $\text{CaCl}_2$  was added at the concentrations indicated. *B*, GODZ mediates the transport of a number of other cations but not  $\text{Mg}^{2+}$ . Where indicated  $\text{SrCl}_2$ , 0.2 mM;  $\text{BaCl}_2$ , 0.2 mM; or  $\text{MgCl}_2$ ; 0.2 mM was added in place of 0.2 mM  $\text{CaCl}_2$ . Values are means  $\pm$  S.E.M. for 6 individual oocytes. \* indicates significance,  $p < 0.01$ , from calcium alone. *C*, GODZ does not mediate  $\text{Mg}^{2+}$  transport. *Upper panel*, current-voltage (I-V) relationships obtained from linear voltage steps in the presence of 2.0 mM  $\text{MgCl}_2$  in control and GODZ-expressing oocytes. Oocytes were clamped at a holding potential of -15 mV and then stepped from -150 to +25 mV in 25 mV increments for 2 s at each of the concentrations indicated. Values are means  $\pm$  S.E.M. of observations measured at the end of each voltage sweep. *Lower panel*, absence  $\text{Mg}^{2+}$  flux into GODZ-expressing oocytes.  $\text{Mg}^{2+}$  fluxes were determined with fluorescence using the  $\text{Mg}^{2+}$ -sensitive dye, mag-fura-2. Results are presented as the 340/385 excitation ratio, which reflects changes in ionized divalent cation concentration. Mag-fura-2 fluorescence ratios were measured in control and GODZ-expressing oocytes, at resting potentials, in solutions consisting of nominally magnesium-free solutions and then with 2.0 mM  $\text{MgCl}_2$  with interruption and subsequently voltage-clamped at a holding potential of -70 mV, where indicated. *D*, GODZ-mediated  $^{45}\text{Ca}^{2+}$  uptake is inhibited by  $\text{Mn}^{2+}$ ,  $\text{La}^{3+}$ ,  $\text{Ba}^{2+}$ , and  $\text{Sr}^{2+}$  but not  $\text{Mg}^{2+}$ . The indicated divalent cations were present at 0.2 mM as the chloride salt in the presence of 0.2 mM  $\text{CaCl}_2$ . GODZ-mediated  $^{45}\text{Ca}^{2+}$  uptake is not influenced by external  $\text{Na}^+$ . Where indicated  $\text{NaCl}$  was replaced by choline chloride (*indicated by -Na<sup>+</sup>*). Values are means  $\pm$  S.E.M. for 6-25 oocytes. \* indicates significance,  $p < 0.01$ , from calcium. *E*,  $\text{H}^+$  dependence of GODZ-mediated  $\text{Ca}^{2+}$  uptake.  $^{45}\text{Ca}^{2+}$  uptakes performed at the given external pH values. Values are means  $\pm$  S.E.M. for five individual experiments. \* indicates significance,  $p < 0.01$ , from pH 7.5. *F*, GODZ-mediated  $\text{Ca}^{2+}$  currents were not inhibited by the calcium channel blocker, nifedipine. Nifedipine, 100 nM, (*indicated by +Nifed*) was added 30 min prior to voltage-clamp. Current measurements were determined as in Fig 1A and data are mean values of the largest observed currents  $\pm$  S.E.M for 3-5 oocytes. \* indicates significance,  $p < 0.01$ , from calcium alone.

Fig.S1

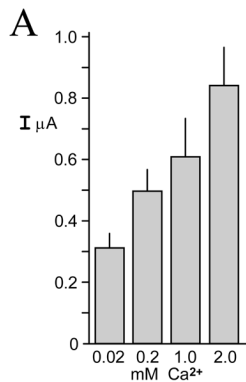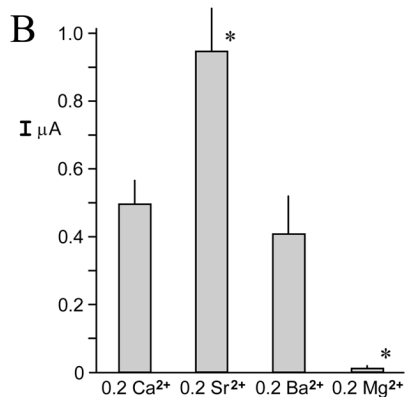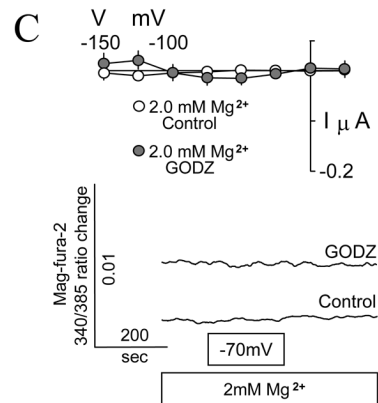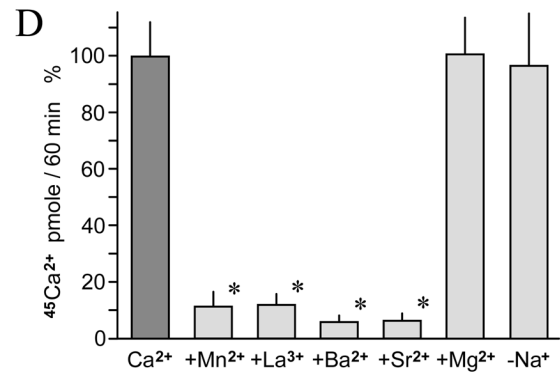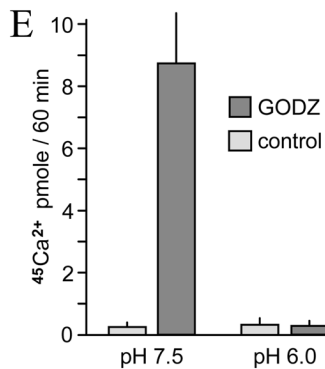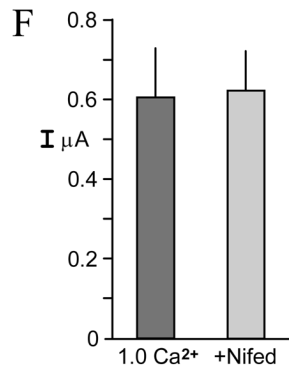

Supplement: supp_M109.069849_jbc.M109.069849-1.pdf [file supp_M109.069849_jbc.M109.069849-1.pdf]
